# Supplementary material for: Effect of curvature on C–F bonding in fluorinated carbons: from fullerene and derivatives to graphite
Source: Royal Society of Chemistry journal article supplement (doi:10.1039/b914853a), 2009-12-23
Supplement: b914853a.pdf [file b914853a.pdf]

## Additional data

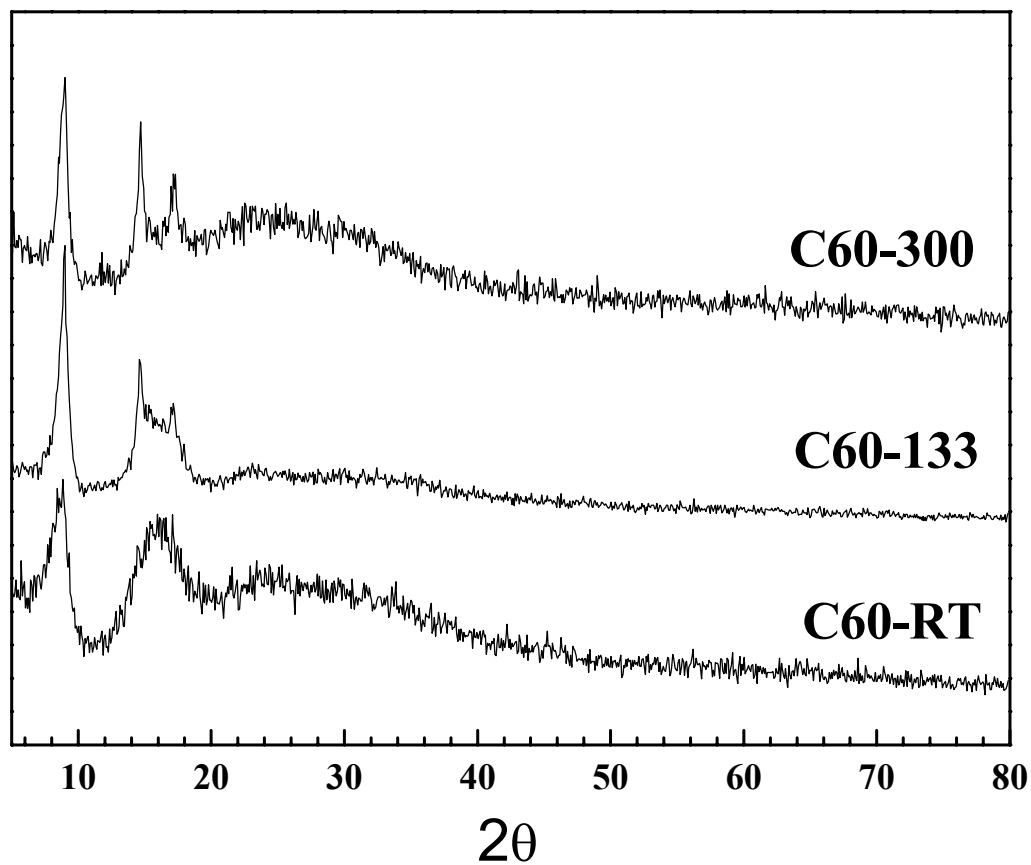

XRD diagrams of fluorinated C<sub>60</sub> according to the fluorination temperature.
